# Supplementary material for: In-depth insight into the Yb3+ effect in NaErF4-based host sensitization upconversion: a double-edged sword
Source: Royal Society of Chemistry journal article supplement (doi:10.1039/d2nr01828d), 2022-01-01
Supplement: d2nr01828d1.pdf [file d2nr01828d1.pdf]

## Supporting Information

### **The in-depth insight of Yb<sup>3+</sup> effect in NaErF<sub>4</sub>-based host sensitization upconversion: a double-edged sword**

*Yang Wang,<sup>‡</sup> Shuai Zhou,<sup>‡</sup> Fuyao Sun, Po Hu, Wei Zhong and Jiajun Fu\**

*School of Chemical Engineering, Nanjing University of Science and Technology,  
210094, China.*

*E-mail: [fujiajun668@gmail.com](mailto:fujiajun668@gmail.com)*

*Yang Wang and Shuai Zhou contributed equally to this work.*

## Supporting Figures

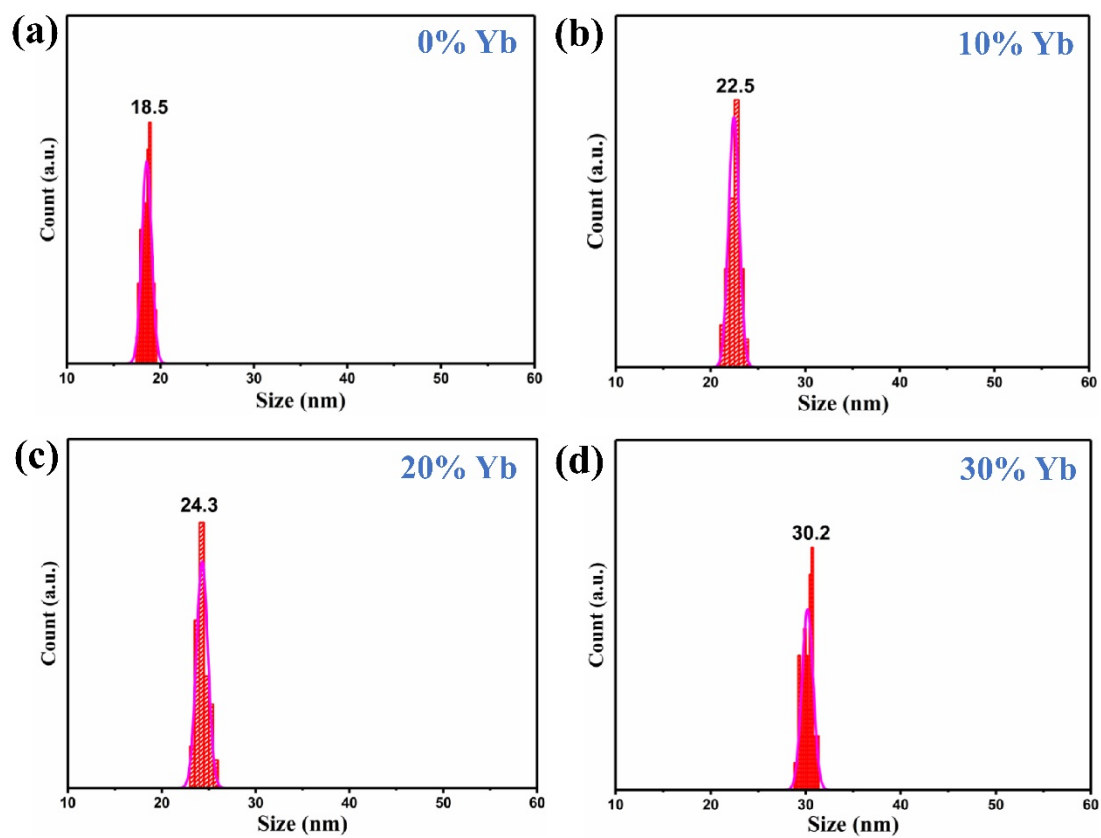

**Figure S1.** Size distribution diagrams of the NaErF<sub>4</sub>:Yb core nanoparticles with different Yb<sup>3+</sup> concentration.

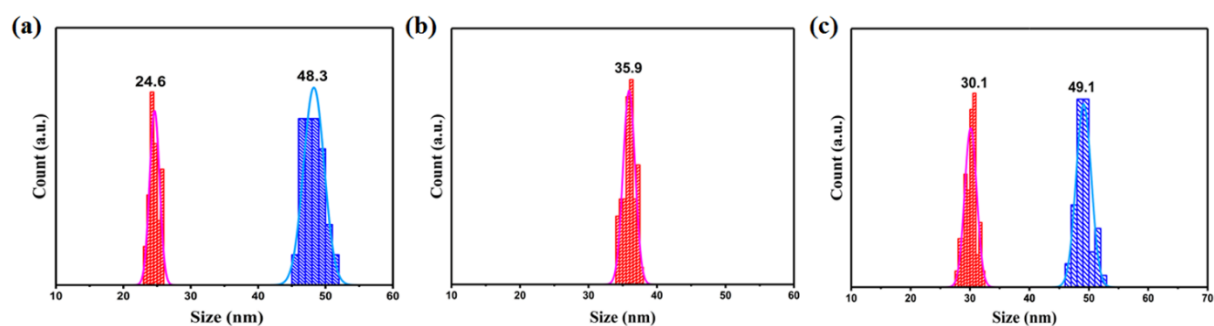

**Figure S2.** Size distribution diagrams of (a)  $\text{NaErF}_4:10\% \text{Yb}@\text{NaYF}_4$ , (b)  $\text{NaErF}_4:10\% \text{Yb}@\text{NaLuF}_4$ , and (c)  $\text{NaErF}_4:10\% \text{Yb}@\text{NaGdF}_4$ .

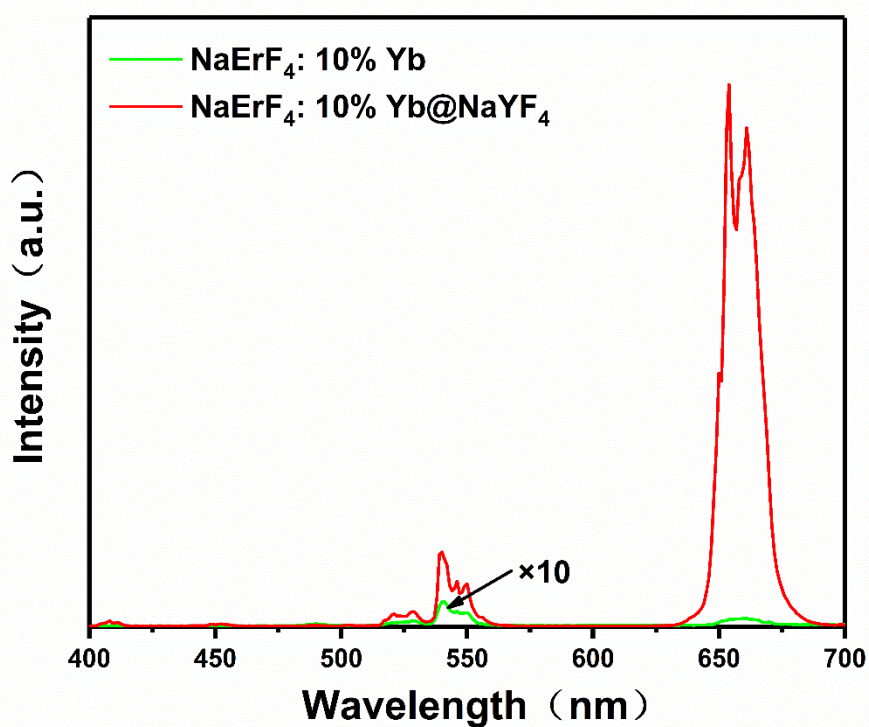

**Figure S3.** Upconversion luminescence spectra of  $\text{NaErF}_4:10\% \text{Yb}$  and  $\text{NaErF}_4:10\% \text{Yb}@\text{NaYF}_4$  excited by 980 nm laser (Concentration: 40 mg/mL; power density:  $20 \text{ W/cm}^2$ ; solvent: cyclohexane).

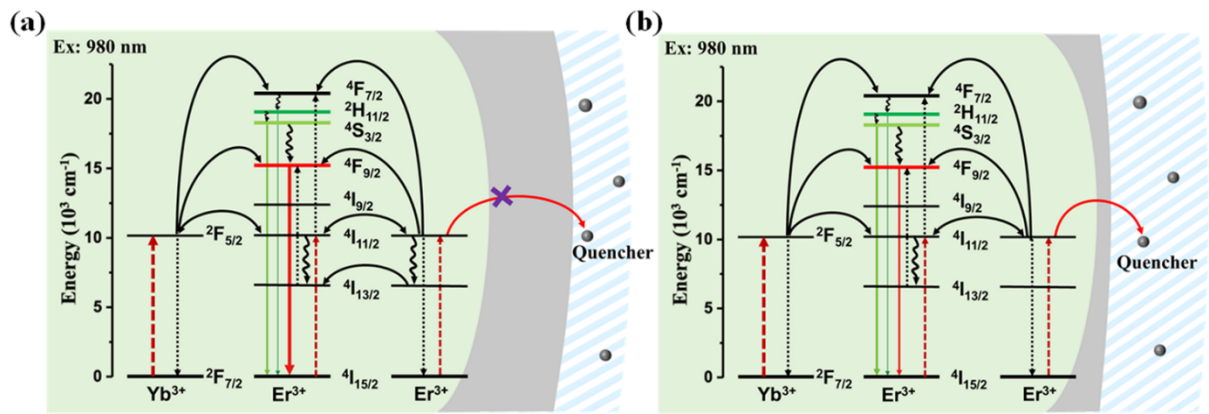

**Figure S4.** Proposed UC mechanisms for NaErF<sub>4</sub>:10%Yb@NaYF<sub>4</sub>/NaLuF<sub>4</sub> (a) and NaErF<sub>4</sub>:10%Yb@NaGdF<sub>4</sub> (b) core-inert shell nanoparticles under 980 nm excitation.

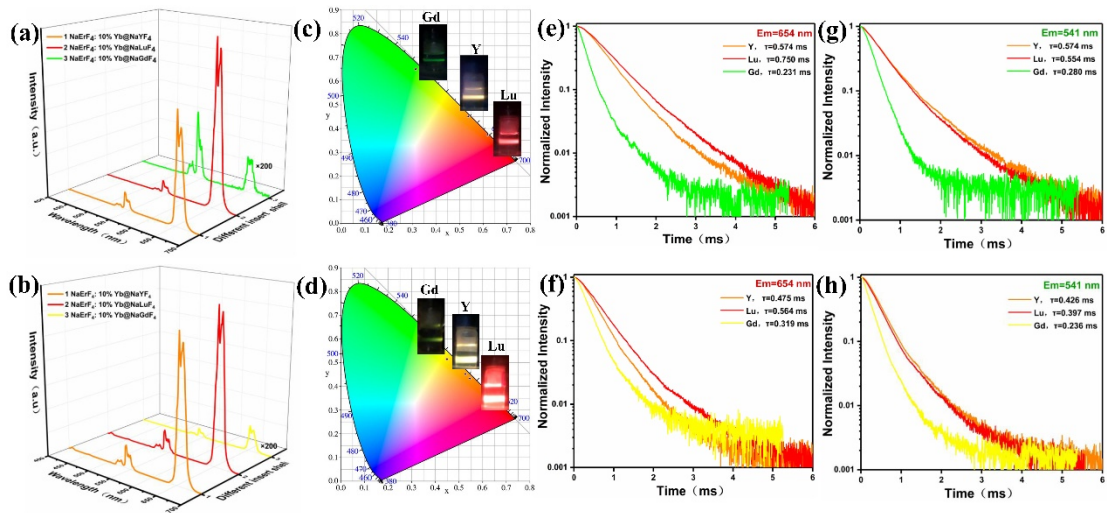

**Figure S5.** UCL spectra of  $\text{NaErF}_4:10\%\text{Yb}@Na\text{YF}_4$ ,  $\text{NaErF}_4:10\%\text{Yb}@Na\text{LuF}_4$  and  $\text{NaErF}_4:10\%\text{Yb}@Na\text{GdF}_4$  excited by 808 nm laser (a) and 1550 nm laser (b) (Concentration: 40 mg/mL; power density: 20 W/cm<sup>2</sup>; solvent: cyclohexane). CIE chromaticity diagrams of  $\text{NaErF}_4:10\%\text{Yb}@Na\text{YF}_4$ ,  $\text{NaErF}_4:10\%\text{Yb}@Na\text{LuF}_4$  and  $\text{NaErF}_4:10\%\text{Yb}@Na\text{GdF}_4$  excited by 808 nm laser (c) and 1550 nm laser (d). Decay curves of  $\text{Er}^{3+}$  in its  $^4\text{F}_{9/2}$  state from  $\text{NaErF}_4:10\%\text{Yb}@Na\text{YF}_4$ ,  $\text{NaErF}_4:10\%\text{Yb}@Na\text{LuF}_4$  and  $\text{NaErF}_4:10\%\text{Yb}@Na\text{GdF}_4$  excited by 808 nm laser (e) and 1550 nm laser (f). Decay curves of  $\text{Er}^{3+}$  in its  $^4\text{S}_{3/2}$  state from  $\text{NaErF}_4:10\%\text{Yb}@Na\text{YF}_4$ ,  $\text{NaErF}_4:10\%\text{Yb}@Na\text{LuF}_4$  and  $\text{NaErF}_4:10\%\text{Yb}@Na\text{GdF}_4$  excited by 808 nm laser (g) and 1550 nm laser (h).

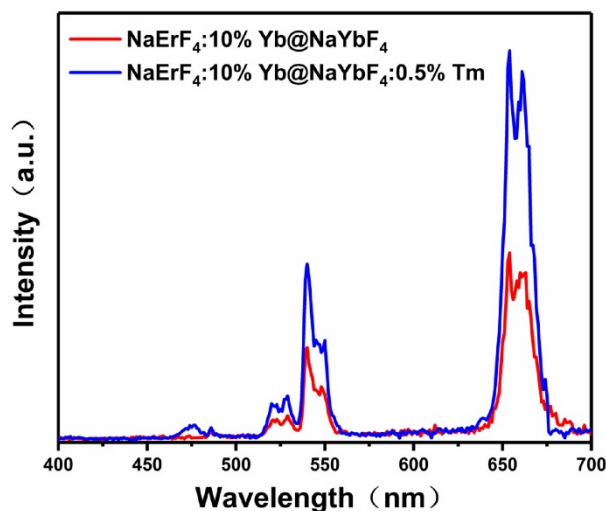

**Figure S6.** UCL spectra of  $\text{NaErF}_4:10\%\text{Yb}@NaYbF_4$  and  $\text{NaErF}_4:10\%\text{Yb}@NaYbF_4:0.5\%\text{Tm}$  excited by 980 nm laser (Concentration: 40 mg/mL; power density: 20  $\text{W}/\text{cm}^2$ ; solvent: cyclohexane).

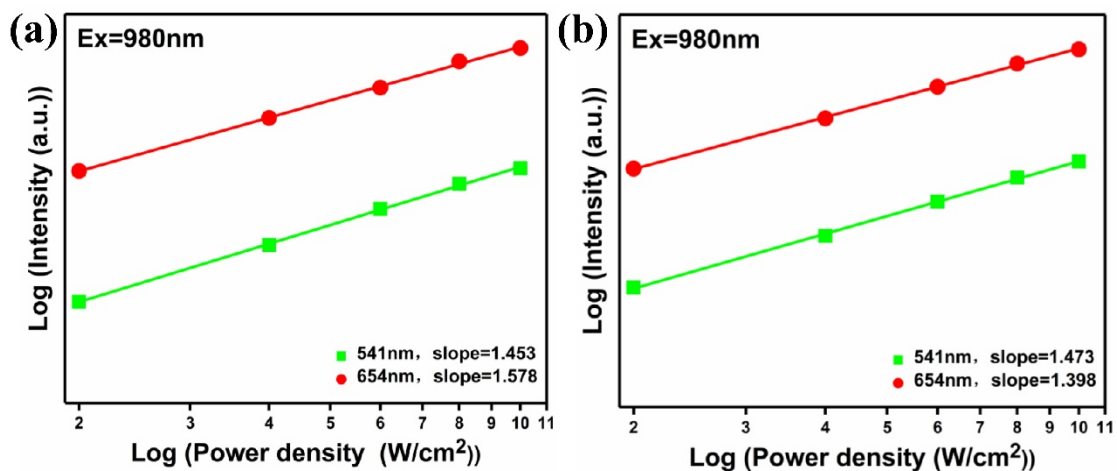

**Figure S7.** Power density dependence of  $\text{Er}^{3+}$  emissions in  $\text{NaErF}_4:10\%\text{Yb}@NaYF_4$  (a) and  $\text{NaErF}_4:10\%\text{Yb}@NaYF_4:20\%\text{Yb}$  (b) under 980 nm excitation.

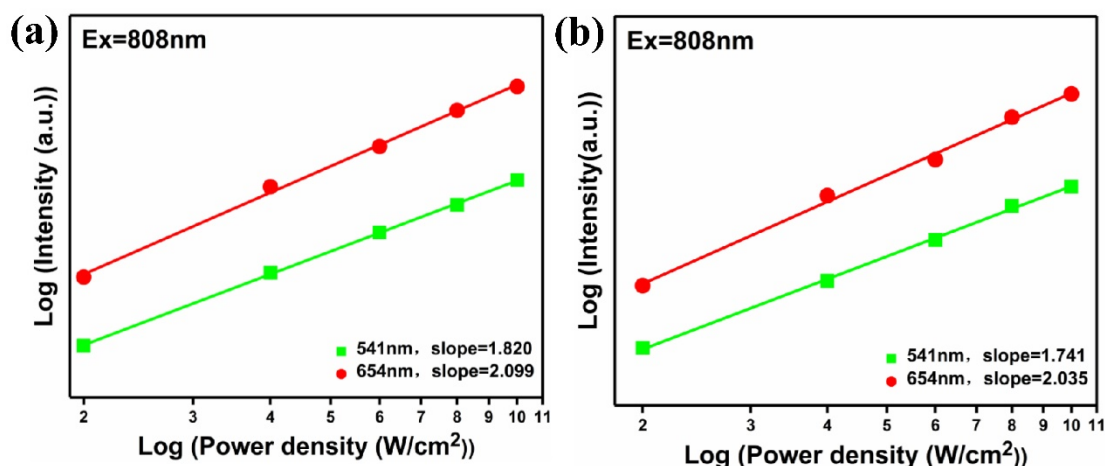

**Figure S8.** Power density dependence of  $\text{Er}^{3+}$  emissions in  $\text{NaErF}_4:10\%\text{Yb}@NaYF_4$  (a) and  $\text{NaErF}_4:10\%\text{Yb}@NaYF_4:20\%\text{Yb}$  (b) under 808 nm excitation.

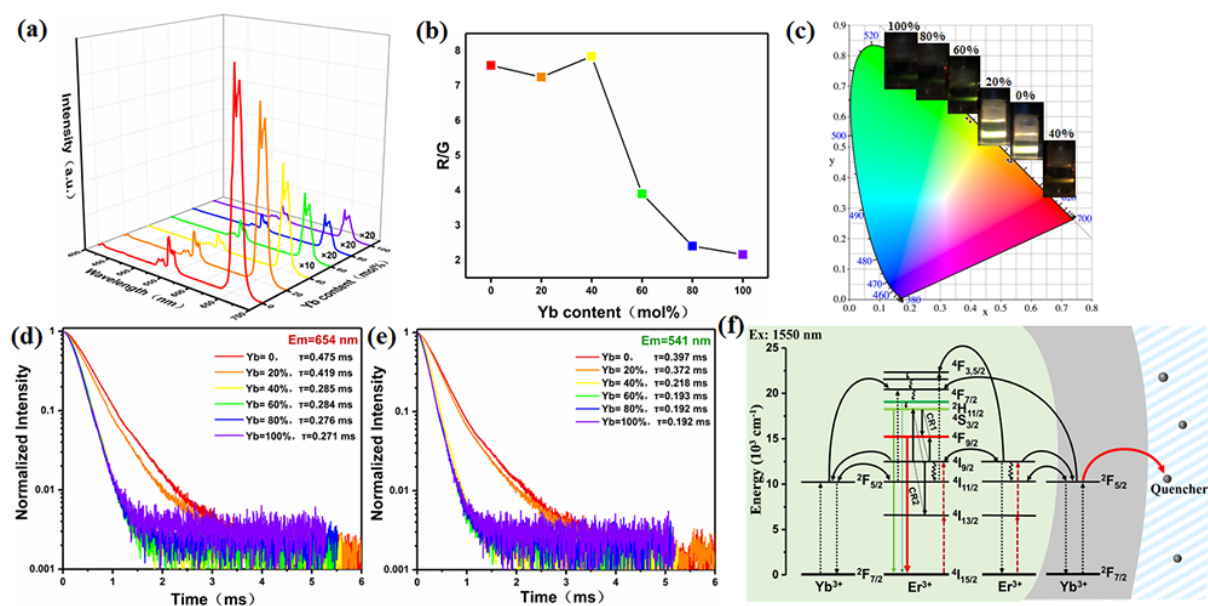

**Figure S9.** (a) UCL spectra of  $\text{NaErF}_4:10\%\text{Yb}@NaY_{1-x}F_4:x\text{Yb}$  core-shell nanoparticles ( $x = 0, 20\%, 40\%, 60\%, 80\%$  and  $100\%$ ) under 1550 nm excitation (Concentration: 40 mg/mL; power density: 20  $\text{W}/\text{cm}^2$ ; solvent: cyclohexane). (b) G/R ratio of (a) samples. (c) CIE chromaticity diagram of the emissions from (a) samples. Decay curves of  $\text{Er}^{3+}$  in its  $^4F_{9/2}$  state (d)

and  $^4S_{3/2}$  (e) in (a) samples under 1550 nm excitation. (f) Proposed energy transfer mechanisms of  $\text{NaErF}_4: 10\% \text{Yb} @ \text{NaYF}_4: \text{Yb}$  under 1550 nm excitation.

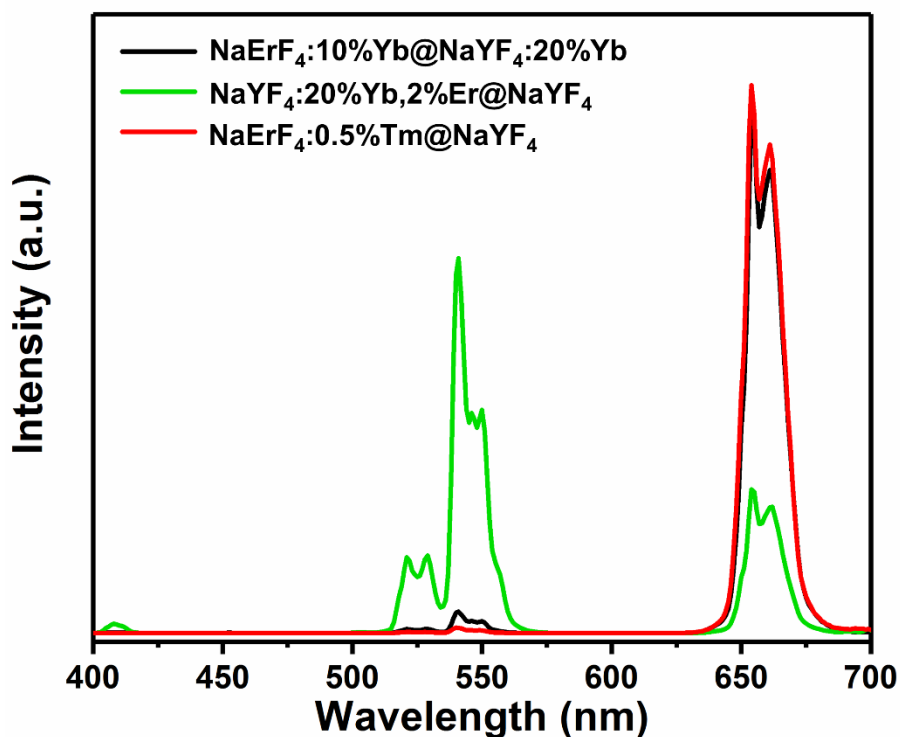

**Figure S10.** UCL spectra of  $\text{NaErF}_4: 10\% \text{Yb} @ \text{NaYF}_4: 20\% \text{Yb}$ ,  $\text{NaYF}_4: 20\% \text{Yb}, 2\% \text{Er} @ \text{NaYF}_4$  and  $\text{NaErF}_4: 0.5\% \text{Tm} @ \text{NaYF}_4$  under 980 nm excitation (Concentration: 40 mg/mL; power density: 20 W/cm<sup>2</sup>; solvent: cyclohexane).



**Table S1.** Decay times of NaErF<sub>4</sub>, NaErF<sub>4</sub>:10%Yb, NaErF<sub>4</sub>:20%Yb, and NaErF<sub>4</sub>:30%Yb monitored at 541 nm under 980 nm excitation.

| Core nanoparticles        | Decay time at 541 nm | Standard deviation* |
|---------------------------|----------------------|---------------------|
| NaErF <sub>4</sub>        | 6.11 $\mu$ s         | 0.074 $\mu$ s       |
| NaErF <sub>4</sub> :10%Yb | 6.37 $\mu$ s         | 0.042 $\mu$ s       |
| NaErF <sub>4</sub> :20%Yb | 6.95 $\mu$ s         | 0.064 $\mu$ s       |
| NaErF <sub>4</sub> :30%Yb | 7.21 $\mu$ s         | 0.057 $\mu$ s       |

\* The standard deviations were acquired from a single fitting.
